# Supplementary material for: 1.8 V all-solid-state flexible asymmetric microsupercapacitors based on direct-writing electrodes
Source: Royal Society of Chemistry journal article supplement (doi:10.1039/d3nr05838g), 2024-01-01
Supplement: d3nr05838g1.pdf [file d3nr05838g1.pdf]

## Supplementary Information

### Direct Writing 1.8 V All-Solid-State Flexible Asymmetric Microsupercapacitors

Yaling Wang,<sup>a</sup> MengYuan Ran,<sup>a</sup> Ming Zhu<sup>a</sup> and Lei Li <sup>\*b</sup>

<sup>a</sup>College of Energy Engineering, Xi'an University of Science and Technology, Xi'an,710054, China

<sup>b</sup>State Key Laboratory for Mechanical Behavior of Materials, Xi'an Jiaotong University, Xi'an Jiaotong University, Xi'an, 710049, China

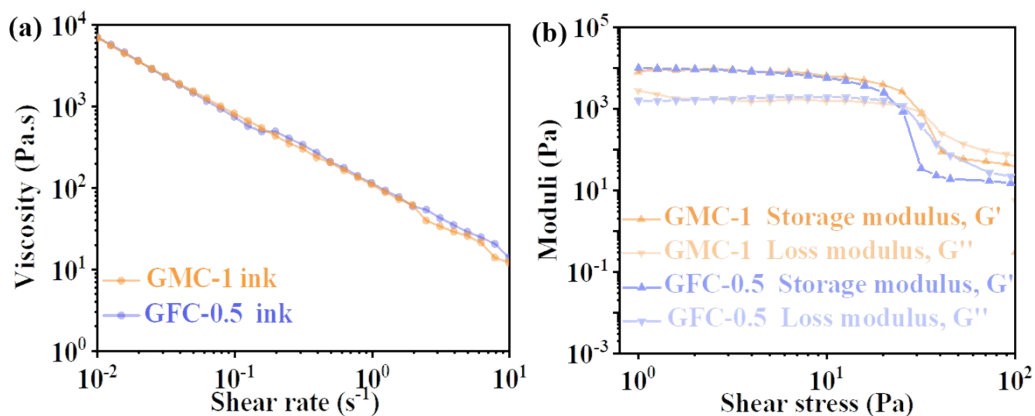

**Fig. S1** The rheological properties of the inks.

(a) Apparent viscosities of GMC-1 and GFC-0.5 inks at a shear rate from 0.01 to 10 s<sup>-1</sup>. (b) Storage and loss modulus of GMC-1 and GFC-0.5 inks at a shear stress from 1 to 100 Pa.

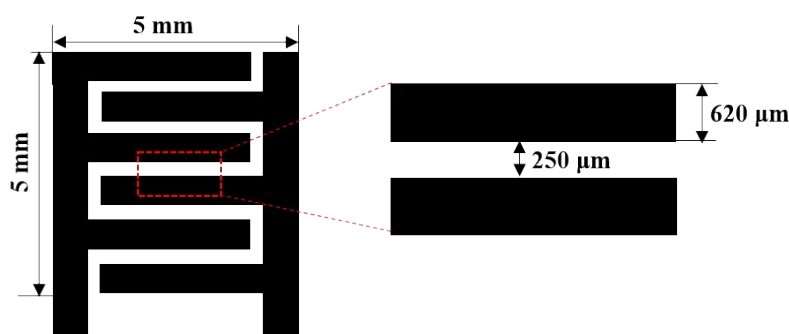

**Fig. S2** Dimensions of the printed electrodes for GMC//GFC AMSCs.

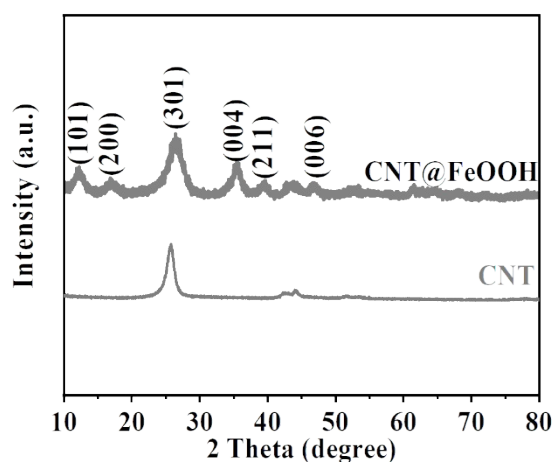

**Fig. S3 and Fig. S4** Characterization of electrode components.

Fig. S3 XRD patterns of CNT and CNT@FeOOH.

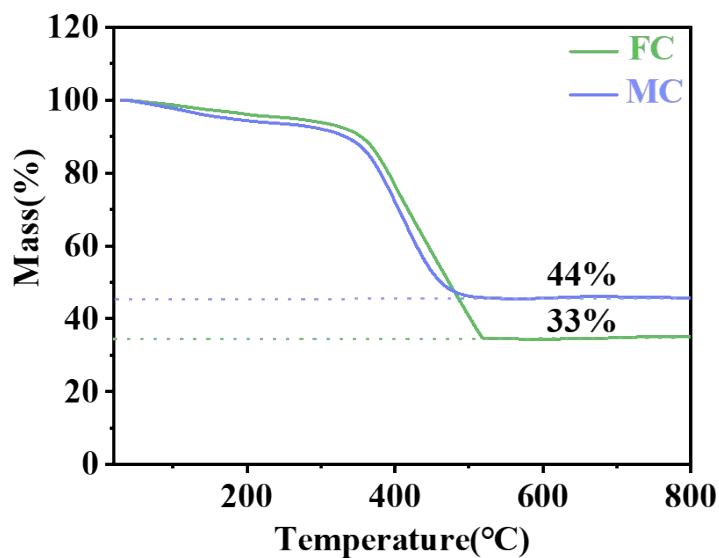

Fig. S4 TGA analysis of MC and FC.

Fig. S5-S9 and Table S1 Electrochemical properties of electrodes and devices.

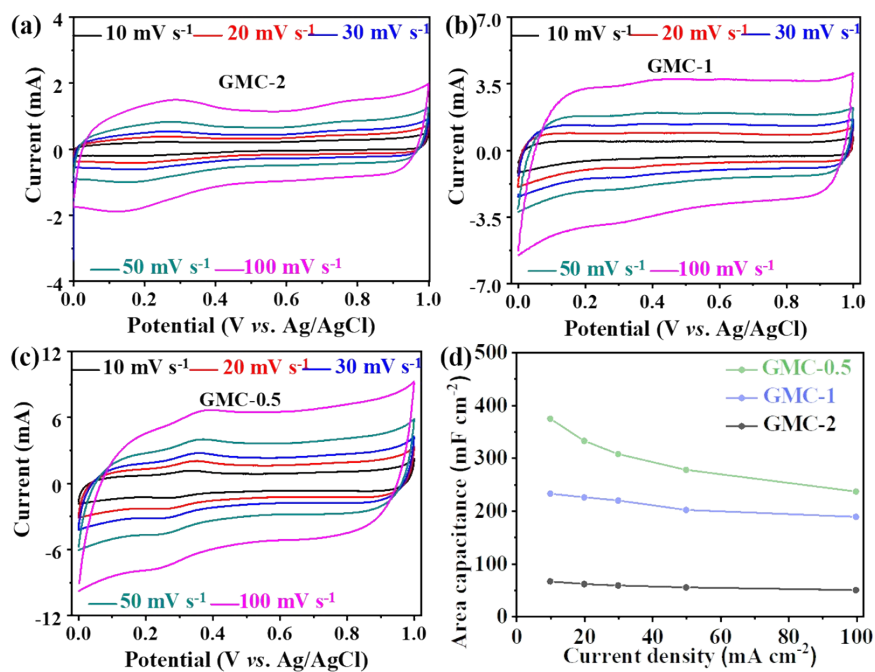

Fig. S5 (a-c) CV curves of GMC-2, GMC-1 and GMC-0.5 electrodes at various scan rates. (d) Specific areal capacitance of GMC-2, GMC-1 and GMC-0.5 electrodes at different scan rates of GMC-X.

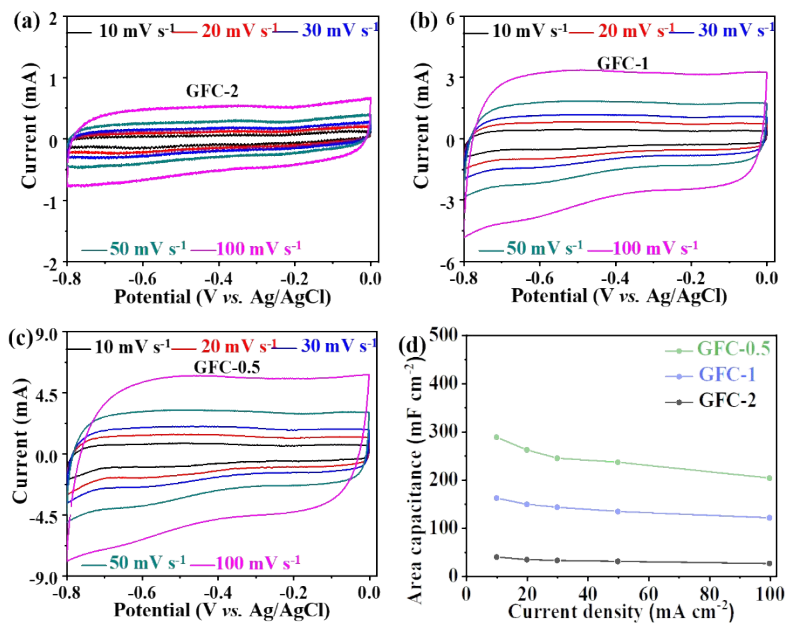

**Fig. S6** (a-c) CV curves of GFC-2, GFC-1 and GFC-0.5 at various scan rates. (d) Specific areal capacitance of GFC-2, GFC-1 and GFC-0.5 at different scan rates.

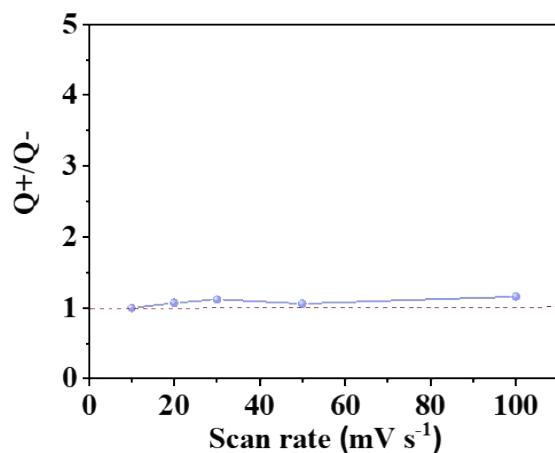

**Fig. S7** The  $Q_+/Q_-$  for GMC-1 and GFC-0.5 electrodes at various scan rates.

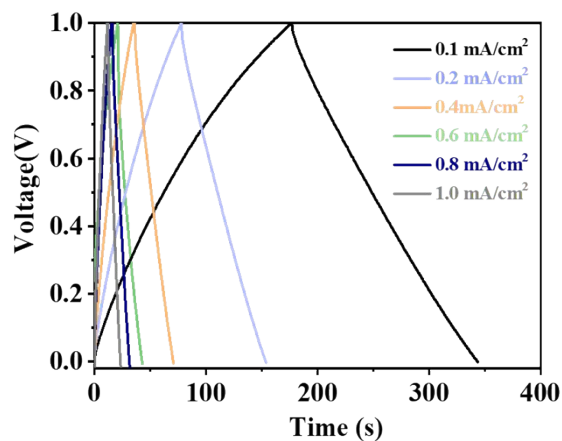

**Fig. S8** GCD curves of GMC MSC at different current densities.

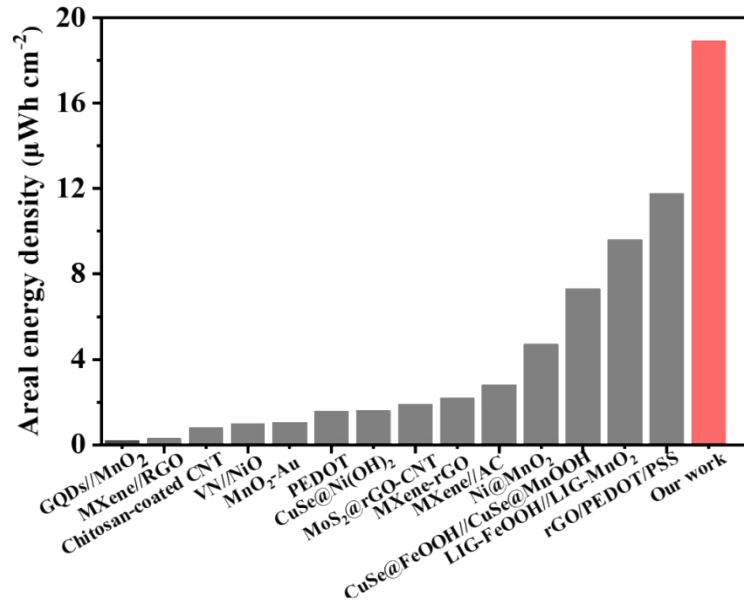

**Fig. S9** Comparison of the areal energy density between GMC//GFC AMSC and other reported MSC and AMSC.<sup>1-14</sup> Ref. S1: GQDs//MnO<sub>2</sub>, Ref. S2: MXene//RGO, Ref. S3: Chitosan-coated CNT, Ref. S4: VN//NiO, Ref. S5: MnO<sub>2</sub>-Au, Ref. S6: PEDOT, Ref. S7: CuSe@Ni(OH)<sub>2</sub>, Ref. S8: MoS<sub>2</sub>@rGO-CNT, Ref. S9: MXene-rGO, Ref. S10: MXene//AC, Ref. S11: Ni@MnO<sub>2</sub>, Ref. S12: CuSe@FeOOH//CuSe@MnOOH, Ref. S13: LIG-FeOOH//LIG-MnO<sub>2</sub>, Ref. S14: rGO/PEDOT/PSS.

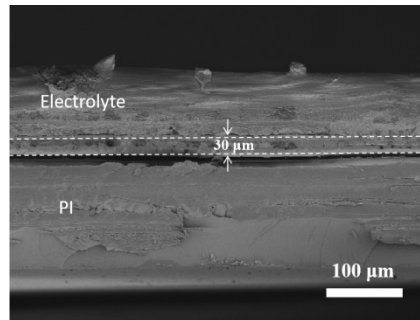

**Fig S10** The cross-sectional SEM images of the printed pseudocapacitive electrodes for AMSCs.

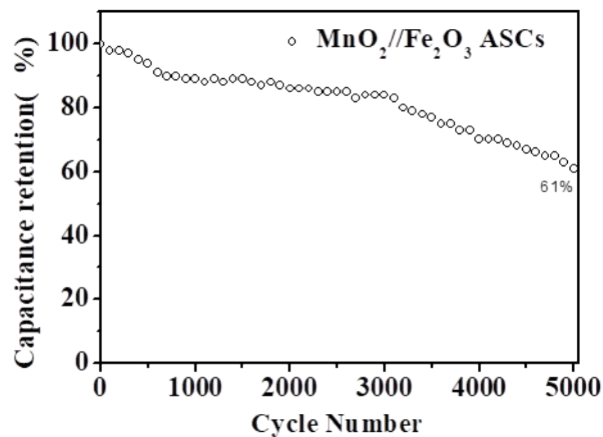

**Fig. S11** Cycling performance of MnO<sub>2</sub>//Fe<sub>2</sub>O<sub>3</sub> ASC at a current density of 0.4 mA cm<sup>-2</sup>.

**Table S1** the  $Q_+/Q_-$  at various scan rates for GMC-X and GFC-Y.

| $Q_+/Q_-$<br>Scan rate | GMC-2<br>/GFC-2 | GMC-2<br>/GFC-1 | GMC-2<br>/GFC-0.5 | GMC-1<br>/GFC-2 | GMC-1<br>/GFC-1 | GMC-1<br>/GFC-0.5 | GMC-0.5<br>/GFC-2 | GMC-0.5<br>/GFC-1 | GMC-0.5<br>/GFC-0.5 |
|------------------------|-----------------|-----------------|-------------------|-----------------|-----------------|-------------------|-------------------|-------------------|---------------------|
| <b>10</b>              | 2.1             | 0.5             | 0.28              | 7.57            | 1.8             | <b>1</b>          | 12.2              | 2.9               | 1.62                |
| <b>20</b>              | 2.3             | 0.5             | 0.29              | 8.54            | 1.9             | <b>1.07</b>       | 12.6              | 2.8               | 1.59                |
| <b>30</b>              | 2.3             | 0.5             | 0.29              | 8.77            | 1.9             | <b>1.12</b>       | 12.3              | 2.7               | 1.57                |
| <b>50</b>              | 2.3             | 0.5             | 0.28              | 8.54            | 1.88            | <b>1.06</b>       | 11.8              | 2.6               | 1.47                |
| <b>100</b>             | 2.4             | 0.5             | 0.30              | 9.4             | 1.95            | <b>1.16</b>       | 11.8              | 2.46              | 1.46                |

**Table S2** Comparison of electrochemical performance of various MSCs and AMSCs.

| Electrode material             | Current collector | Electrolyte                         | Voltage window (V) | Areal Capacitance<br>(mF cm <sup>-2</sup> ) | Areal Energy density<br>(μWh cm <sup>-2</sup> ) | References      |
|--------------------------------|-------------------|-------------------------------------|--------------------|---------------------------------------------|-------------------------------------------------|-----------------|
| GQDs/MnO <sub>2</sub>          | Au                | Na <sub>2</sub> SO <sub>4</sub>     | 0-1.0              | 1.1                                         | 0.2                                             | Ref.S1          |
| MXene/RGO                      | -                 | PVA/H <sub>2</sub> SO <sub>4</sub>  | 0-1.0              | 2.4                                         | 0.3                                             | Ref.S2          |
| Chitosan-coated CNT            | -                 | PVA/H <sub>2</sub> SO <sub>4</sub>  | 0-0.8              | 6.1                                         | 0.8                                             | Ref.S3          |
| VN/NiO                         | -                 | KOH                                 | 0-1.8              | 23.3                                        | 1                                               | Ref.S4          |
| MnO <sub>2</sub> -Au           | -                 | PVA/LiClO <sub>4</sub>              | 0-0.8              | 11.9                                        | 1.1                                             | Ref.S5          |
| PEDOT                          | Au/Cr             | H <sub>2</sub> SO <sub>4</sub>      | 0-0.8              | 21.3                                        | 1.8                                             | Ref.S6          |
| CuSe@Ni(OH) <sub>2</sub>       | Au                | PVA/LiCl                            | 0-1.0              | 13.6                                        | 0.38                                            | Ref.S7          |
| MoS <sub>2</sub> @rGO-CNT      | -                 | PVA/H <sub>2</sub> SO <sub>4</sub>  | 0-1.0              | 13.7                                        | 1.9                                             | Ref.S8          |
| MXene-rGO                      | -                 | PVA/H <sub>2</sub> SO <sub>4</sub>  | 0-0.6              | 61                                          | 3.1                                             | Ref.S9          |
| MXene//AC                      | Au/Cr             | PVA/Na <sub>2</sub> SO <sub>4</sub> | 0-1.6              | 7.8                                         | 2.8                                             | Ref.S10         |
| Ni@MnO <sub>2</sub>            | Au                | PVA/CH <sub>3</sub> COOLi           | 0-0.8              | 52.9                                        | 4.7                                             | Ref.S11         |
| CuSe@FeOOH//CuSe@MnOOH         | Au                | PVA/LiCl                            | 0-1.3              | 20.5                                        | 4.8                                             | Ref.S12         |
| LIG-FeOOH/LIG-MnO <sub>2</sub> | -                 | PVA/LiCl                            | 0-1.8              | 21.9                                        | 9.9                                             | Ref.S13         |
| rGO/PEDOT/PSS.                 | Au                | PVA/H <sub>3</sub> PO <sub>4</sub>  | 0-1.0              | 84.7                                        | 13.1                                            | Ref.S14         |
| <b>GMC//GFC</b>                | -                 | <b>PVA/LiCl</b>                     | <b>0-1.8</b>       | <b>42</b>                                   | <b>18.9</b>                                     | <b>Our work</b> |

**Reference**

- 1 W.-W. Liu, Y.-Q. Feng, X.-B. Yan, J.-T. Chen and Q.-J. Xue, *Adv. Funct. Mater.*, 2013, 23, 4111-4122.
- 2 C. Couly, M. Alhabeab, K.L. Van Aken, N. Kurra, L. Gomes, A.M. Navarro-Suárez, B. Anasori,

- H.N. Alshareef and Y. Gogotsi, *Adv. Electron. Mater.*, 2018, 4, 1700339.
- 3 Y. Yang, L. He, C. Tang, P. Hu, X. Hong, M. Yan, Y. Dong, X. Tian, Q. Wei and L. Mai, *Nano Res.*, 2016, 9, 2510-2519.
  - 4 E. Eustache, R. Frappier, R.L. Porto, S. Bouhtiyya, J.F. Pierson and T. Brousse, *Electrochem. Commun.*, 2013, 28, 104-106.
  - 5 H. Hu, Z. Pei, H. Fan and C. Ye, *Small*, 2016, 12, 3059-3069.
  - 6 Y. Diao, Y. Lu, H. Yang, H. Wang, H. Chen and J.M. D'Arcy, *Adv. Funct. Mater.*, 2020, 2003394.
  - 7 J. Gong, J.-C. Li, J. Yang, S. Zhao, Z. Yang, K. Zhang, J. Bao, H. Pang, and M. Han, *ACS Appl. Mater. Inter.*, 2018, 10, 38341-38349.
  - 8 W. Yang, L. He, X. Tian, M. Yan, H. Yuan, X. Liao, J. Meng, Z. Hao and L. Mai, *Small*, 2017, 13, 1700639.
  - 9 C.J. Zhang, M.P. Kremer, A. Seral-Ascaso, S.-H. Park, N. McEvoy, B. Anasori and Y. Gogotsi, *Adv. Funct. Mater.*, 2018, 28, 1705506.
  - 10 Y. Xie, H. Zhang, H. Huang, Z. Wang, Z. Xu, H. Zhao, Y. Wang, N. Chen and W. Yang, *Nano Energy*, 2020, 74, 104928.
  - 11 Y. Lin, Y. Gao and Z. Fan, *Adv. Mater.* 2017, 29, 1701736.
  - 12 J.-C. Li, J. Gong, X. Zhang, L. Lu, F. Liu, Z. Dai, Q. Wang, X. Hong, H. Pang and M. Han, *ACS Appl. Energy Mater.*, 2020, 3, 3692-3703.
  - 13 L. Li, J. Zhang, Z. Peng, Y. Li, C. Gao, Y. Ji, R. Ye, N.D. Kim, Q. Zhong, Y. Yang, H. Fei, G. Ruan and J.M. Tour, *Adv. Mater.*, 2016, 28, 838-845.
  - 14 Y. Liu, B. Weng, Q. Xu, Y. Hou, C. Zhao, S. Beirne, K. Shu, R. Jalili, G.G. Wallace, J.M. Razal and J. Chen, *Adv. Mater. Technol.*, 2016, 1, 1600166.
